# Supplementary material
Source: publisher site journal article supplement (https://www.dovepress.com/article/321616)

## Supplementary Table 1: Pyrosequencing Primers

| Gene         | Primers (5'-3')                                                                                             | CpG Residues                                                                                              |
|--------------|-------------------------------------------------------------------------------------------------------------|-----------------------------------------------------------------------------------------------------------|
| <i>foxp3</i> | Fwd: TGGTGAAGTGGATTGATAGAAAAGG<br>Rev: Biotin-TATAAAAACCCCCCCCACC<br>Sequencing:<br>ATTAGTTTGGTTTGTGGGAAATT | CpG <sup>-138</sup> , CpG <sup>-126</sup> , CpG <sup>-113</sup> , CpG <sup>-77</sup> , CpG <sup>-65</sup> |

**Supplementary Figure 1: Schematic representation of the FOXP3 gene and the 5 CpG sites in the promoter region that were investigated.**

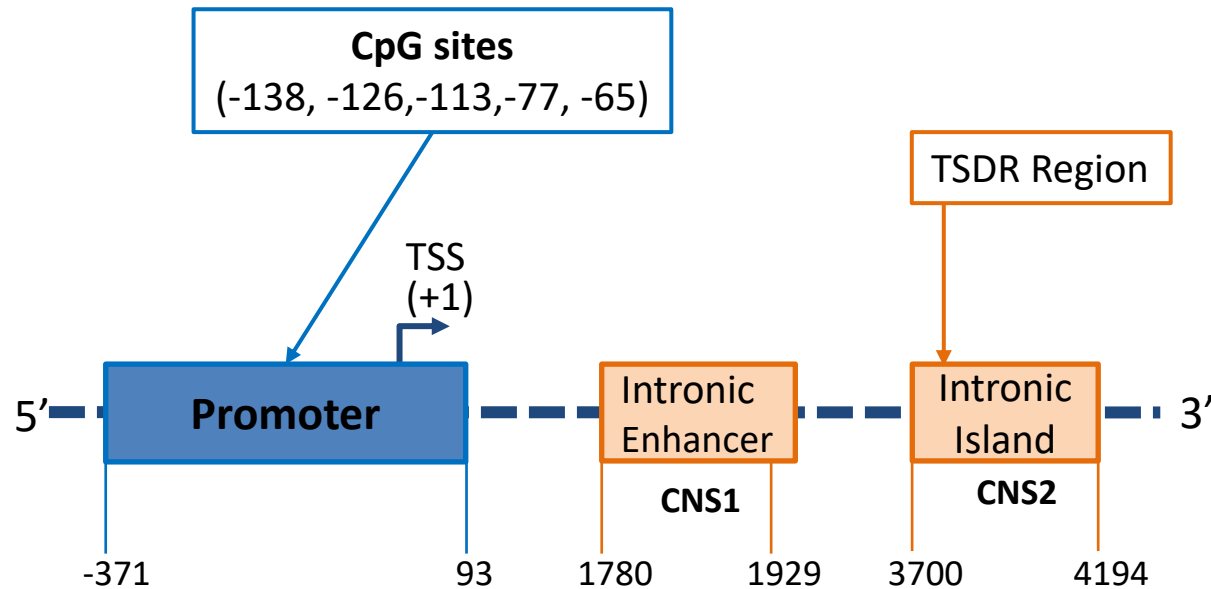

**Supplementary Figure 2. Effect of ASHMI on IFN- $\gamma$  production of asthmatic subject PBMCs (n=5). \*P<0.05.**

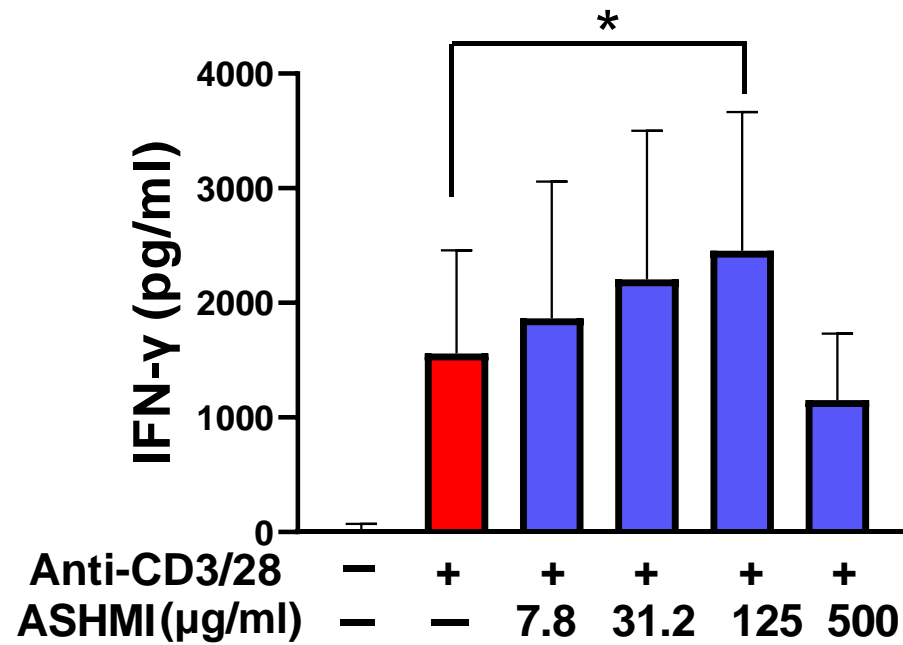

Supplement: Supplementary file 1 [file get_supplementary_file.php]
